# Supplementary material
Source: publisher figshare collection journal article supplement (https://frontiersin.figshare.com/ndownloader/files/14207495)
Supplement: Supplementary file [file 14207495]

## Supplementary Text

The pEX18Tc- $\Delta cyaA$  was constructed by cloning the 880 bp upstream and 963 bp downstream fragments of the *cyaA* gene into the *EcoRI-HindIII* sites of plasmid pEX18Tc. The pEX18Tc- $\Delta cyaB$  was constructed by cloning the 1019 bp upstream and 802 bp downstream fragments of the *cyaB* gene into the *EcoRI-HindIII* sites of plasmid pEX18Tc. The pEX18Tc- $\Delta vfr$  was constructed by cloning the 1090 bp upstream and 1064 bp downstream fragments of the *vfr* gene into the *EcoRI-HindIII* sites of plasmid pEX18Tc. The pEX18Tc- $\Delta nadD2$  was constructed by cloning the 816 bp upstream and 835 bp downstream fragments of the *nadD2* gene into the *EcoRI-HindIII* sites of plasmid pEX18Tc. The pEX18Tc- $\Delta nadD2-nrtR$  was constructed by cloning the 816 bp upstream and 1308 bp downstream fragments of the *nadD2-nrtR* operon into the *HindIII* site of plasmid pEX18Tc.
